# Supplementary material for: Host-Specific Diversity of Culturable Bacteria in the Gut Systems of Fungus-Growing Termites and Their Potential Functions towards Lignocellulose Bioconversion
Source: MDPI journal article supplement (doi:10.3390/insects14040403), 2023-04-21
Supplement: s1 [file s1]

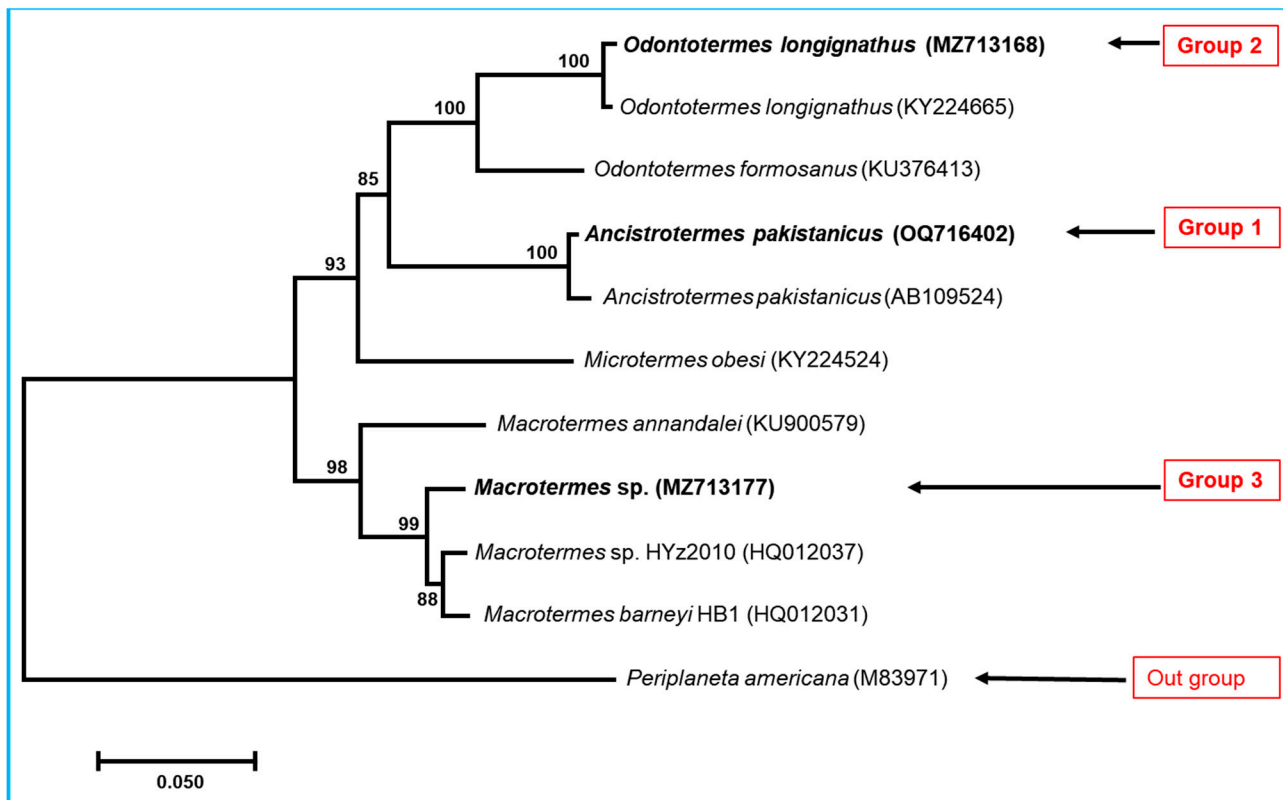

**Figure S1.** The phylogenetic affiliation of the termite species used in the present study. The phylogenetic tree was reconstructed with the Neighbour-Joining method in Mega 7 based on the cytochrome oxidase II gene sequences of the termites. The termite species used for the isolation of lignocellulolytic gut bacteria are marked in bold.
